# Supplementary material for: Summary of Nursing Assistance to Xinjiang Experience: A Qualitative Study (2019–2025) of Local Nurses at Tiemenguan People's Hospital, Xinjiang
Source: Research Square preprint supplement (doi:10.21203/rs.3.rs-8075197/v1), 2025-12-22
Supplement: Supplementary file 1 [file 7f6f9b36c08b1603ddc7b384.docx]

| **No** | **Interview Questions** |
| --- | --- |
| **1** | How would you evaluate the current implementation of nursing assistance at your hospital? |
| **2** | What functions or impacts do you hope nursing assistance will achieve? |
| **3** | What problems have you encountered during the nursing‑assistance process, and what support do you need? |
| **4** | Which aspects of the nursing‑assistance implementation concern you the most, and what barriers do you perceive? |
| **5** | Do you have any additional suggestions for improving the implementation of nursing assistance? |

**Appendix 1 Interview Guide for Nursing Assistance to Xinjiang Study**
